# Supplementary material for: Manganese oxide as an alternative to vanadium-based catalysts for effective conversion of glucose to formic acid in water
Source: Royal Society of Chemistry journal article supplement (doi:10.1039/d1gc03637h), 2021-11-26
Supplement: d1gc03637h1.pdf [file d1gc03637h1.pdf]

## Supplementary Information

### **Manganese oxide as an alternative to vanadium-based catalysts for effective conversion of glucose to formic acid in water**

Jialu Li,<sup>a</sup> Richard Lee Smith Jr,<sup>b</sup> Siyu Xu,<sup>a</sup> De Li,<sup>a</sup> Jirui Yang,<sup>a</sup> Keqiang Zhang,<sup>\*a</sup> Feng Shen<sup>\*a</sup>

<sup>a</sup> Agro-Environmental Protection Institute, Ministry of Agriculture and Rural Affairs, No. 31

Fukang Road, Nankai District, Tianjin 300191, China.

<sup>b</sup> Graduate School of Environmental Studies, Research Center of Supercritical Fluid Technology,

Tohoku University, Aramaki Aza Aoba 6-6-11, Aoba, Sendai 980-8579, Japan.

*\*Corresponding author* (handling correspondence at all stages): Dr. Feng Shen,

E-mail address: [shenfeng@caas.cn](mailto:shenfeng@caas.cn)

*\*Corresponding author*: Prof. Keqiang Zhang, E-mail address: [keqiangzhang68@163.com](mailto:keqiangzhang68@163.com)

Total number of pages: 8

Total number of figures: 5

Total number of tables: 3

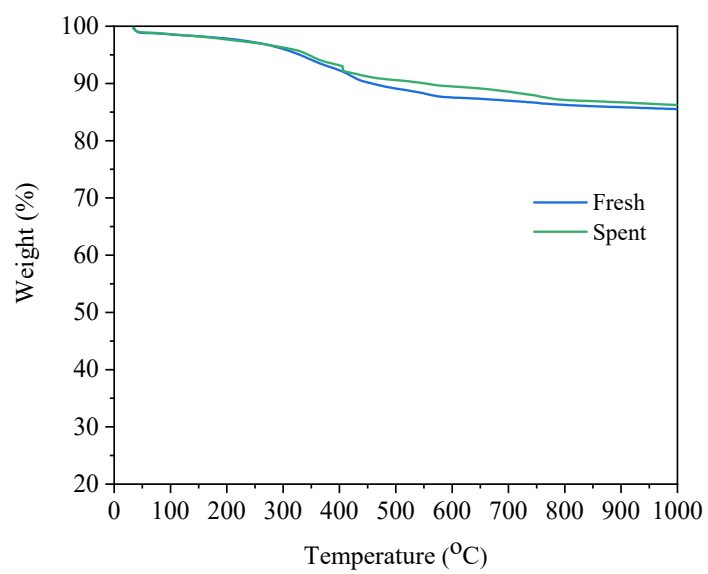

**Figure S1** Thermal gravimetric analyses (TGA) of fresh MnO<sub>x</sub>-100 and spent MnO<sub>x</sub>-100 after reaction at 170 °C for 150 min.

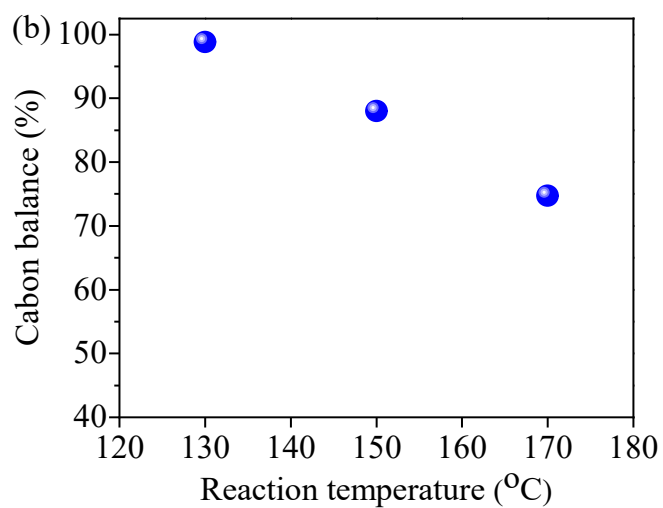

**Figure S2** Carbon balances obtained after oxidation reaction with  $\text{MnO}_x$ -100 catalyst at several temperatures. Reaction conditions: 50 mg catalyst, 100 mg glucose, 5 mL  $\text{H}_2\text{O}$ , 150 min reaction time, 3 MPa  $\text{O}_2$

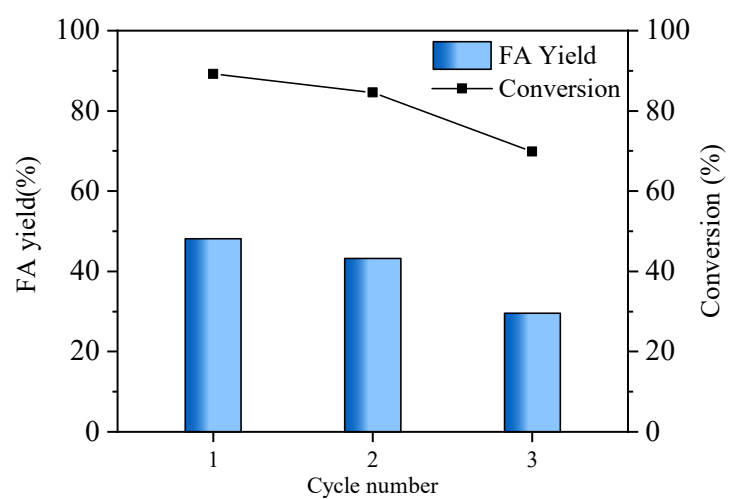

**Figure S3** Recyclability of MnO<sub>x</sub>-100 catalyst for initial catalyst dosage of 50 mg. Reaction

conditions: 100 mg glucose, 5 mL H<sub>2</sub>O, 150 °C, 3 MPa O<sub>2</sub>, 100 min reaction time.

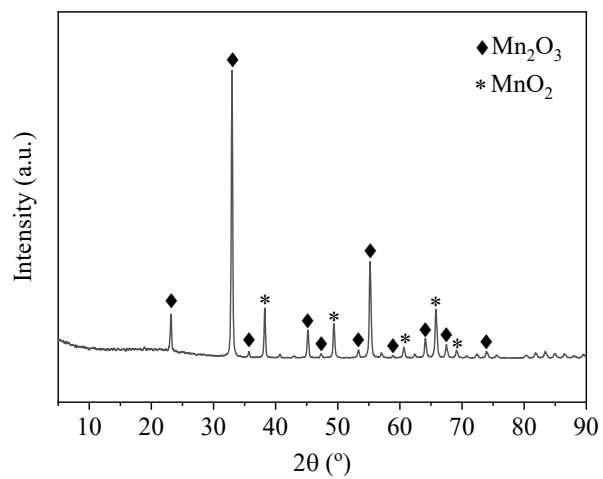

**Figure S4** XRD spectrum of  $\text{MnO}_x$ -100 catalyst after three cycles of use according to conditions

in Fig. S3. ( $\text{MnO}_2$ : JCPDS PDF# 72-1982.  $\text{Mn}_2\text{O}_3$ : JCPDS PDF# 41-1442)

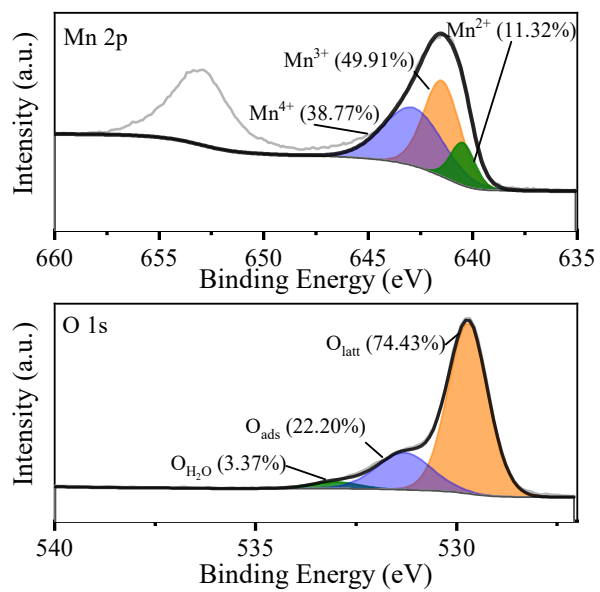

**Figure S5** XPS of spectrum of MnO<sub>x</sub>-100 catalyst after three cycles of use according to conditions

in Fig. S3

**Table S1** Total surface area and pore volume of synthesized catalysts

| Catalyst              | $S_{\text{BET}}(\text{m}^2 \cdot \text{g}^{-1})$ | Pore volume ( $\text{cm}^3 \cdot \text{g}^{-1}$ ) |
|-----------------------|--------------------------------------------------|---------------------------------------------------|
| MnO <sub>x</sub> -100 | 28.0                                             | 0.30                                              |
| MnO <sub>x</sub> -120 | 16.7                                             | 0.08                                              |
| MnO <sub>x</sub> -140 | 16.9                                             | 0.08                                              |

**Table S2** Comparison of maximum formic acid (FA) yields obtained from glucose in aqueous solutions for different homogeneous catalysts

| Catalyst                                                        | Key reaction conditions     |                                                          |                  |          | Yield (%) | Ref. |
|-----------------------------------------------------------------|-----------------------------|----------------------------------------------------------|------------------|----------|-----------|------|
|                                                                 | Glucose concentration (g/L) | Oxidant concentration or O <sub>2</sub> partial pressure | Temperature (°C) | Time (h) |           |      |
| LiOH                                                            | 9                           | 2.5 mmol H <sub>2</sub> O <sub>2</sub>                   | 35               | 8        | 91.3      | 1    |
| KOH                                                             | -                           | 1 mmol H <sub>2</sub> O <sub>2</sub>                     | 250              | 1/60     | 75.0      | 2    |
| NaOH                                                            | -                           | 1 mmol H <sub>2</sub> O <sub>2</sub>                     | 259              | 1/60     | 70.0      | 2    |
| VOSO <sub>4</sub>                                               | 9                           | 2 MPa O <sub>2</sub>                                     | 140              | 1        | 45.0      | 3    |
| FeCl <sub>3</sub> + H <sub>2</sub> SO <sub>4</sub>              | 26                          | 3 MPa O <sub>2</sub>                                     | 170              | 5/6      | 52.3      | 4    |
| NaVO <sub>3</sub> +H <sub>2</sub> SO <sub>4</sub>               | 17                          | 3 MPa O <sub>2</sub>                                     | 160              | 1/60     | 68.2      | 5    |
| H <sub>4</sub> PVMo <sub>11</sub> O <sub>40</sub>               | 10                          | 2 MPa O <sub>2</sub>                                     | 180              | 3        | 54.5      | 6    |
| H <sub>5</sub> PV <sub>2</sub> Mo <sub>10</sub> O <sub>40</sub> | 10                          | 2 MPa O <sub>2</sub>                                     | 100              | 3        | 55.0      | 7    |
| H <sub>6</sub> PV <sub>3</sub> Mo <sub>9</sub> O <sub>40</sub>  | 50                          | 3 MPa O <sub>2</sub>                                     | 90               | 8        | 56.0      | 8    |
| H <sub>7</sub> PV <sub>4</sub> Mo <sub>8</sub> O <sub>40</sub>  | 50                          | 3 MPa O <sub>2</sub>                                     | 90               | 8        | 52.0      | 8    |
| H <sub>7</sub> PV <sub>5</sub> Mo <sub>8</sub> O <sub>40</sub>  | 22                          | 6 MPa O <sub>2</sub>                                     | 80               | 8        | 58.2      | 9    |

**Table S3** Conversion of glucose, arabinose or glyoxylic acid to formic acid (FA) with MnO<sub>x</sub>-100 catalyst. Reaction conditions: 50 mg catalyst, 20 g/L substrate, 5 mL H<sub>2</sub>O, 160 °C, 3 MPa O<sub>2</sub>, 100 min reaction time.

| Substrate      | Conversion (%) | FA yield (%) |
|----------------|----------------|--------------|
| Glucose        | 94.6           | 55.7         |
| Arabinose      | 100            | 69.8         |
| Glyoxylic acid | 100            | 73.4         |

1. Wang, C.; Chen, X.; Qi, M.; Wu, J.; Gözaydın, G.; Yan, N.; Zhong, H.; Jin, F., Room temperature, near-quantitative conversion of glucose into formic acid. *Green Chemistry* **2019**, *21*, 6089-6096.
2. Jin, F.; Yun, J.; Li, G.; Kishita, A.; Tohji, K.; Enomoto, H., Hydrothermal conversion of carbohydrate biomass into formic acid at mild temperatures. *Green Chemistry* **2008**, *10*, 612-615.
3. Tang, Z.; Deng, W.; Wang, Y.; Zhu, E.; Wan, X.; Zhang, Q.; Wang, Y., Transformation of cellulose and its derived carbohydrates into formic and lactic acids catalyzed by vanadyl cations. *ChemSusChem* **2014**, *7*, 1557-1567.
4. Hou, Y.; Lin, Z.; Niu, M.; Ren, S.; Wu, W., Conversion of cellulose into formic acid by Iron(III)-catalyzed oxidation with O<sub>2</sub> in acidic aqueous solutions. *ACS Omega* **2018**, *3*, 14910-14917.
5. Wang, W.; Niu, M.; Hou, Y.; Wu, W.; Liu, Z.; Liu, Q.; Ren, S.; Marsh, K. N., Catalytic conversion of biomass-derived carbohydrates to formic acid using molecular oxygen. *Green Chemistry* **2014**, *16*, 2614-2618.
6. Zhang, J.; Sun, M.; Liu, X.; Han, Y., Catalytic oxidative conversion of cellulosic biomass to formic acid and acetic acid with exceptionally high yields. *Catalysis Today* **2014**, *233*, 77-82.
7. Li, J.; Ding, D. J.; Deng, L.; Guo, Q. X.; Fu, Y., Catalytic air oxidation of biomass-derived carbohydrates to formic acid. *ChemSusChem* **2012**, *5*, 1313-1318.
8. Albert, J.; Luders, D.; Bosmann, A.; Guldi, D.; Wasserscheid, P., Spectroscopic and electrochemical characterization of heteropoly acids for their optimized application in selective biomass oxidation to formic acid. *Green Chemistry* **2014**, *16*, 226-237.
9. Reichert, J.; Albert, J., Detailed kinetic investigations on the selective oxidation of biomass to formic acid (OxFA Process) using model substrates and real biomass. *ACS Sustainable Chemistry & Engineering* **2017**, *5*, 7383-7392.
